# Supplementary material
Source: Research Square preprint supplement (doi:10.21203/rs.3.rs-8870566/v1)
Supplement: Supplementary file 1 [file 08ae10b66633a50c33a267c8.docx]

**Interview Guide on Women’s Experiences on Respectful Maternity at St. Anne’s Hospital in Damongo**

**Section A: Demographic information of Participants**

1. What is your age?
2. What is your level of education?
3. What is your occupation?
4. What is your religion?
5. What is your marital status?
6. How many children do you have?

**Section B:** **Women’s Understanding of Respectful Maternity Care.**

1. Tell me about your pregnancy and birth of your baby - what did you do to look after yourself? Who helped you? (Probe)
2. Tell me about your experiences concerning mistreated or any form of disrespect during your maternity care at St. Anne's Hospital?
3. How do you perceive the preservation of dignity in the context of maternity care, based on your experiences at St. Anne's Hospital?
4. Reflecting on your labour and childbirth experiences, can you narrate specific aspects that made you feel that you received respectful maternity care?

**Interview Transcripts**

**1. Tell me about your pregnancy and birth of your baby - what did you do to look after yourself? Participant 1:** "Taking care of myself during pregnancy was a priority, and having a supportive family made it easier. My mother and husband, in particular, stood by me every step of the way  **Participant 2:** I made sure to prioritize a healthy diet and sufficient rest, because I know these are very important for self-care. However, my journey was significantly enriched by the support of my family. In particular, my mother and sister helped me through emotional encouragement. Their presence including practical assistance with daily chores, creating an environment that nurtured both my physical and emotional health. **Interviewer:** Can you provide examples of behaviours or actions from healthcare providers that, in your view, represent respectful maternity care during labour and childbirth? **Participant 3**: "Getting the right support was not always easy. During my first childbirth, the hospital was very crowded, and it took time to get the attention I needed. This made the whole process more stressful, and I felt that the support I required was delayed."  **Participant 4:** "I didn't face much difficulty accessing support at the hospital. There were times when it was busy, but the staff tried their best to attend to everyone. "  **Interviewer:** Can you share instances where healthcare providers showed respect during your labour and childbirth? What did they do? **Participant 5:** "At moments, during my second pregnancy, I felt the midwives were harsh and didn't seem to understand what I was going through. It was tough because they didn't seem to care about my feelings, and it made the whole experience very difficult for me."

**Participant 6:** "I remember during my first pregnancy; I was quite nervous and in severe pain. The midwife asked me to turn over and I could not, instead, I laid on the bed and all I did was to cry. She shouted at me, saying that do I think she has all the time to stay and wait for me. It quite made me feel unhappy." **Participant 7:** "I had my first pregnancy when I was a teenager, and it was quite challenging. The process got complicated, and I was told I could only deliver by they ‘cutting my stomach open’ and bringing the baby out. The baby was big, and I was told it couldn't be delivered through the normal process. The midwife sensitized me properly, and everything went on successfully, Thanks to God. The midwife gave me words of encouragement that helped me during that difficult time." **Participant 2:** "The midwife was gentle and encouraging. She praised me for my efforts and ensured I felt dignified even in vulnerable moments." **Interviewer:** How well do you think healthcare providers communicate with you during labour and childbirth at St. Anne's Hospital? **Participant 4:** "When I was in labour, I appreciated when the healthcare providers kept me informed about the progress of labour. It was important for me to know what was happening at every stage and what I could do to help myself, as it reduced my stress. However, there were instances when it felt a bit hurried. I believe introducing caregivers and making us familiar with the rooms and equipment in a less rushed manner would enhance the overall experience."

**Have you ever felt mistreated or experienced any form of disrespect during your maternity care at St. Anne's Hospital? Interviewer: Participant 5:** "Going into labour and pushing the baby out is a very difficult task but my first and second experiences were quite positive. The midwife was my uncle’s daughter, so she handled me really well. The helping staff were incredibly attentive and ensured I felt comfortable throughout the process. Additionally, I was actively educated women about the importance of breastfeeding immediately after delivery and providing guidance on mother-baby bonding." **Participant 10**: "During labour, I was told I had a tear in my vagina. I was in so much pain that I had not even realized. The nurse in charge calmed me down, encouraged me to hold in the pain a little bit more so that she could sew me." **Participant 8:** "I felt mistreated when a midwife dismissed my questions without proper explanations. I remember asking about the pain I was feeling, and it seemed like my concerns weren't being taken seriously. That was upsetting because I needed clear information and reassurance at that moment." **Participant 9:** “In my experience, there were instances where my choice of birth position and movement was restricted. On several occasions, when I wanted to give birth in a squatting position, healthcare providers intervened, trying to convince me to labour in the conventional position. Despite my preference, they pressured me and, at times, used force to make me conform to their desired birthing posture. This felt like a violation of my autonomy and added unnecessary stress to the childbirth process.” **Interviewer:** Do you feel comfortable telling healthcare providers if you think you've been mistreated? **Participant 1:** "I will feel comfortable telling healthcare providers if I think I've been mistreated. It's important to address issues so that improvements can be made for others. We need to speak up for ourselves and future mothers." **Participant 6:** "There might be hesitation to report mistreatment. There's a fear of backlash, and sometimes you just want to move on from a negative experience without making it a bigger issue. It's not always easy to speak up."
